# Supplementary material
Source: PubMed Central journal article supplement (PMC11009173)

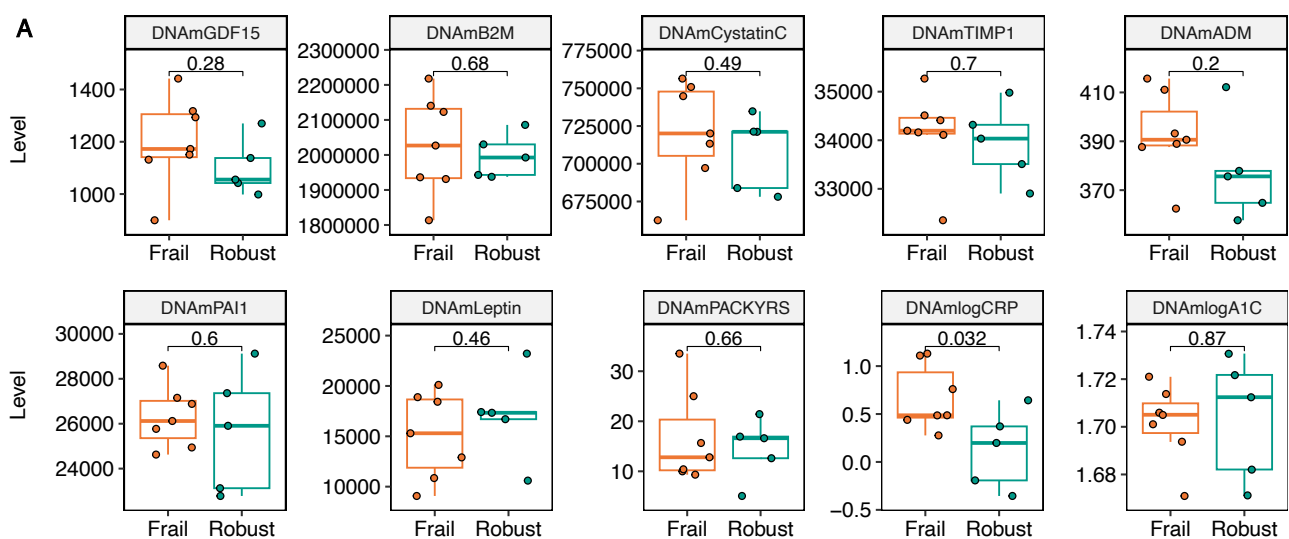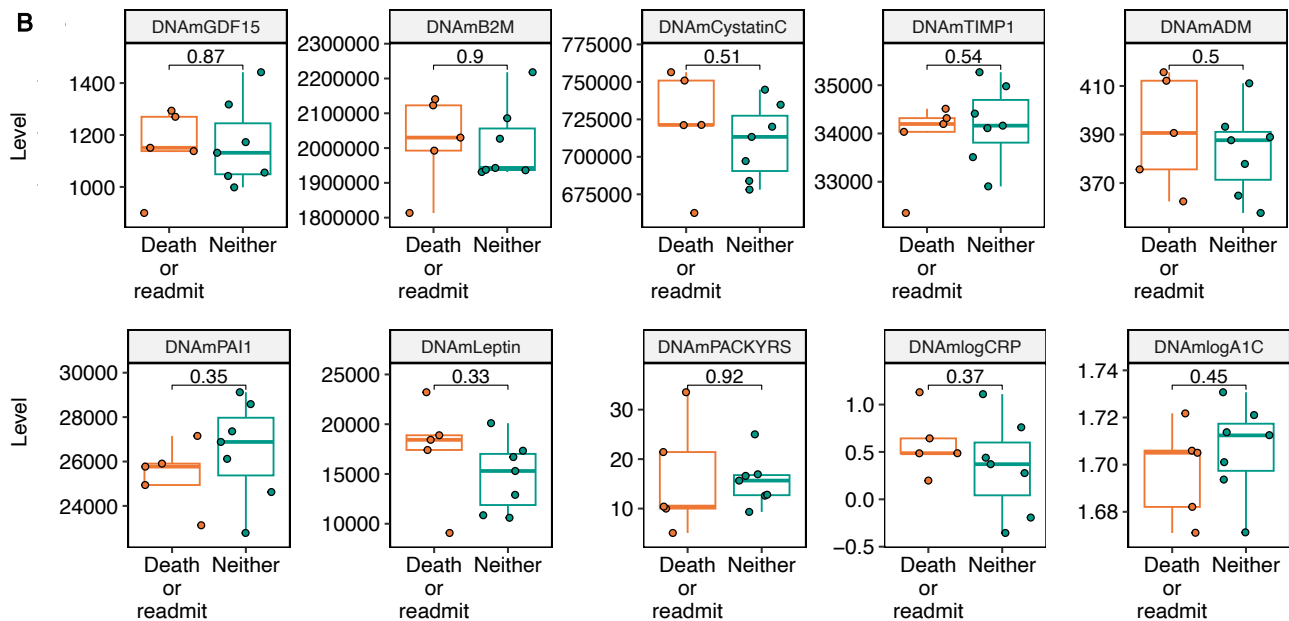

Supplement: 11357_2024_1076_MOESM1_ESM.pdf [file 11357_2024_1076_MOESM1_ESM.pdf]
